# Supplementary material for: Size-dependent adsorption and its application in determining the number of surfactant molecule adsorbed on multimodal SiO2 particles by 2D-DCS
Source: Royal Society of Chemistry journal article supplement (doi:10.1039/c8an01068d), 2018-01-01
Supplement: c8an01068d1.pdf [file c8an01068d1.pdf]

## Supporting Information

Size-dependent adsorption and its application in determining surfactant molecule number on multimodal SiO<sub>2</sub> particles separately by 2D-DCS

*Guolan Tian, Lan Chen\*, Renxiao Liu, and Guanglu Ge\**

CAS Key Laboratory of Standardization and Measurement for Nanotechnology, CAS Center for Excellence in Nanoscience, National Center for Nanoscience and Technology,  
No. 11 ZhongguancunBeiyitiao, Beijing 100190, China

Corresponding Author E-mail: [chenlan@nanoctr.cn](mailto:chenlan@nanoctr.cn); [gegl@nanoctr.cn](mailto:gegl@nanoctr.cn)

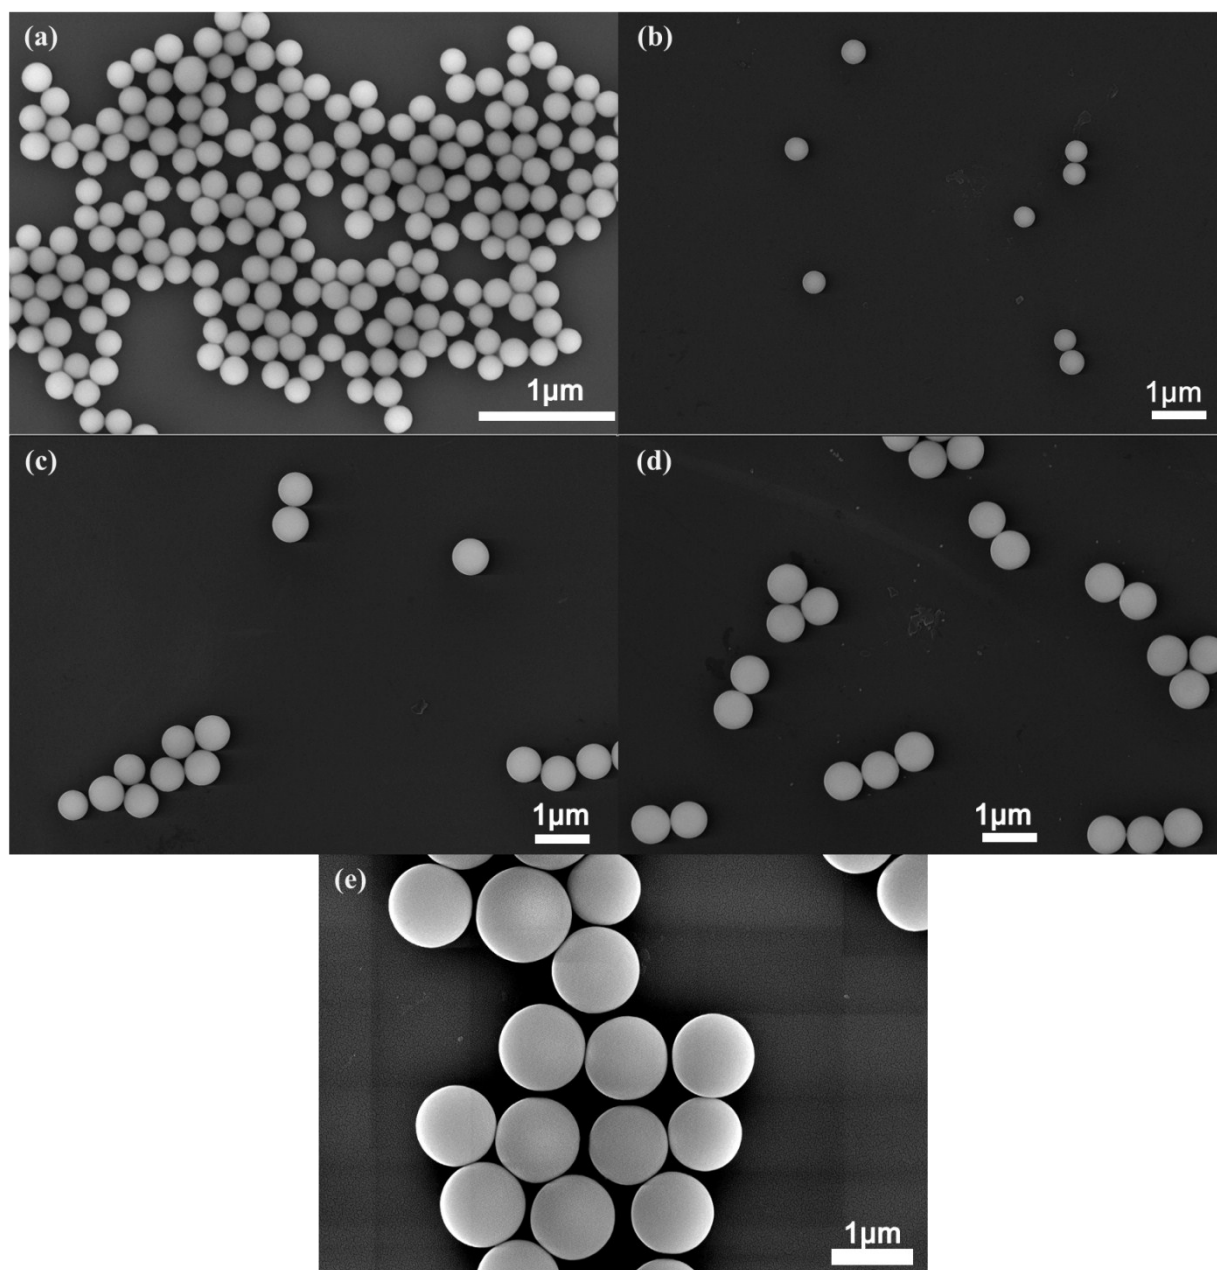

**Figure S1.** SEM images of the as-synthesized SiO<sub>2</sub> particles with average diameter of (a) 210nm, (b) 430nm, (c) 630nm, (d) 700nm, and (e) 1000nm, respectively

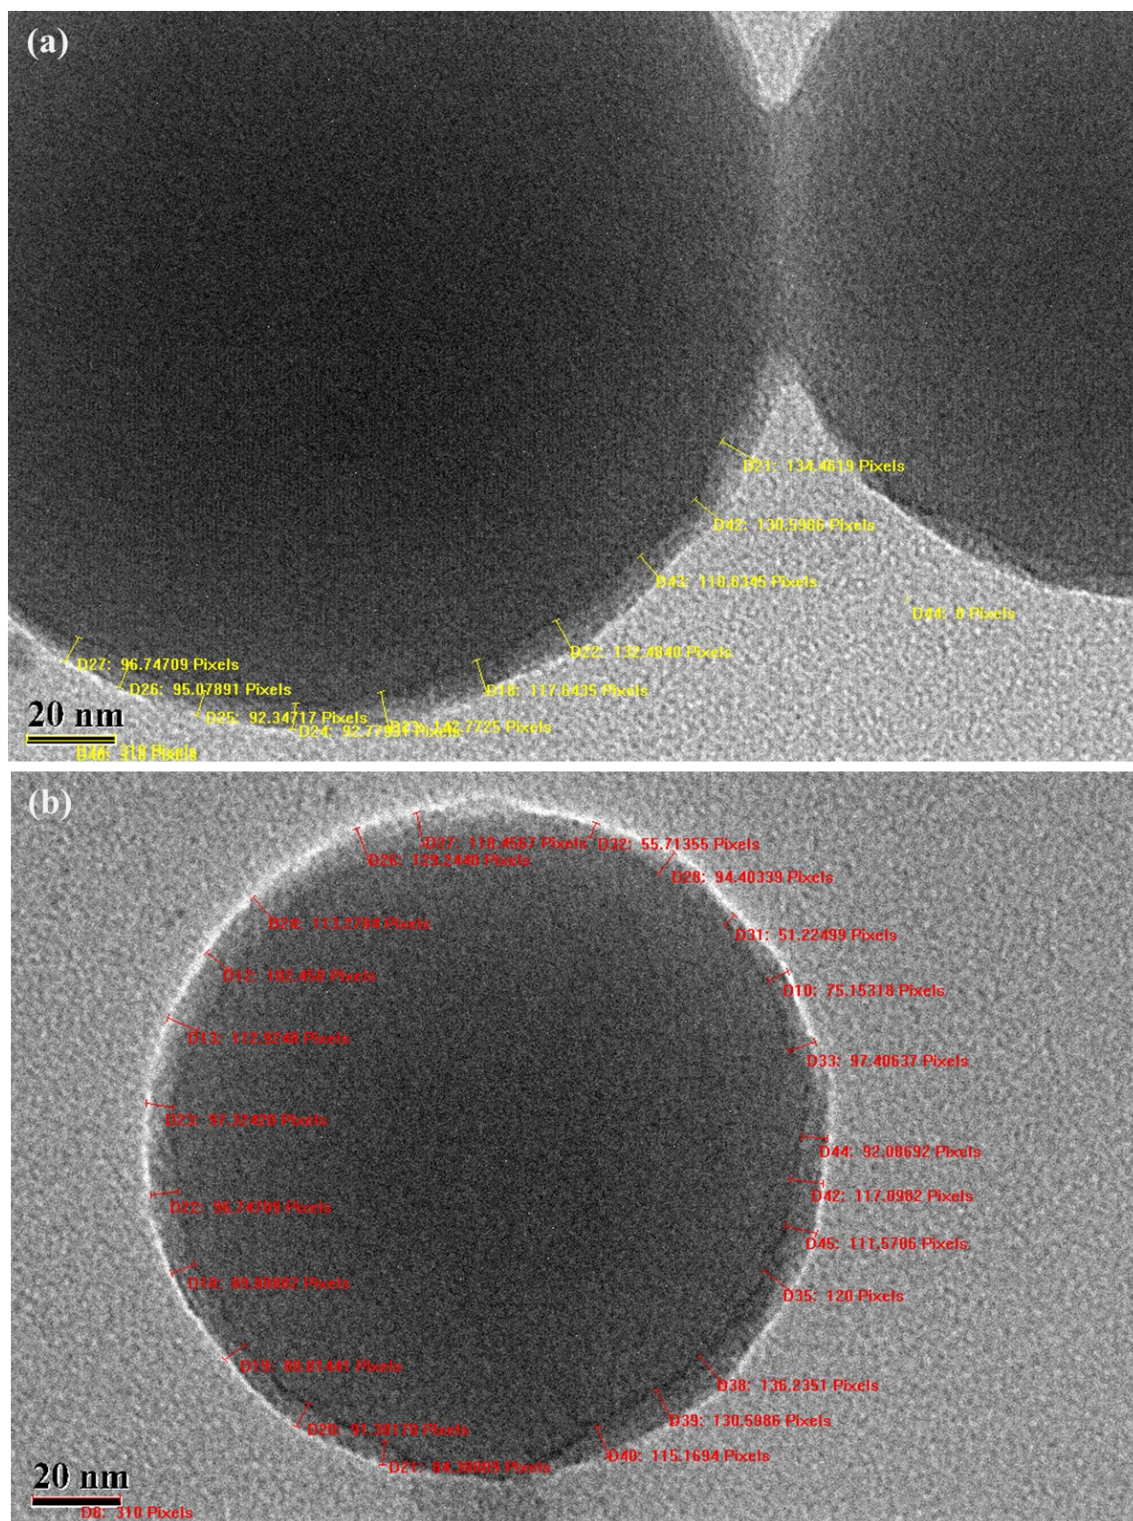

**Figure S2.** TEM images of CTAB-adsorbed SiO<sub>2</sub> nanoparticles (a) the average layer thickness =7.39 (b) the average layer thickness =6.46

**Table S1.** Statistic determination of CTAB adlayer thickness on different SiO<sub>2</sub> nanoparticles

| #      | line length | thickness | line length | thickness |
|--------|-------------|-----------|-------------|-----------|
|        | pixels      | nm        | pixels      | nm        |
| 1      | 134.46      | 8.67      | 118.45      | 7.64      |
| 2      | 130.60      | 8.43      | 129.24      | 8.34      |
| 3      | 110.63      | 7.14      | 113.28      | 7.31      |
| 4      | 132.48      | 8.55      | 102.45      | 6.61      |
| 5      | 117.64      | 7.59      | 112.92      | 7.29      |
| 6      | 142.77      | 9.21      | 97.32       | 6.28      |
| 7      | 92.77       | 5.99      | 96.75       | 6.24      |
| 8      | 92.34       | 5.96      | 89.89       | 5.80      |
| 9      | 95.08       | 6.13      | 88.81       | 5.73      |
| 10     | 96.75       | 6.24      | 91.30       | 5.89      |
| 11     |             |           | 84.38       | 5.44      |
| 12     |             |           | 55.71       | 3.59      |
| 13     |             |           | 94.40       | 6.09      |
| 14     |             |           | 51.22       | 3.30      |
| 15     |             |           | 75.15       | 4.85      |
| 16     |             |           | 97.41       | 6.28      |
| 17     |             |           | 92.09       | 5.94      |
| 18     |             |           | 117.10      | 7.55      |
| 19     |             |           | 110.57      | 7.13      |
| 20     |             |           | 120.00      | 7.74      |
| 21     |             |           | 136.23      | 8.79      |
| 22     |             |           | 130.60      | 8.43      |
| 23     |             |           | 115.17      | 7.43      |
| 24     |             |           | 84.38       | 5.44      |
| AVE    | 114.55      | 7.39      | 100.20      | 6.46      |
| STDEV  |             | 1.26      |             | 1.39      |
| Median |             | 7.365     |             | 6.28      |

Note: the layer thickness is determined based on the particles in Figure S2, where 1nm is equal to 15.5 pixels.

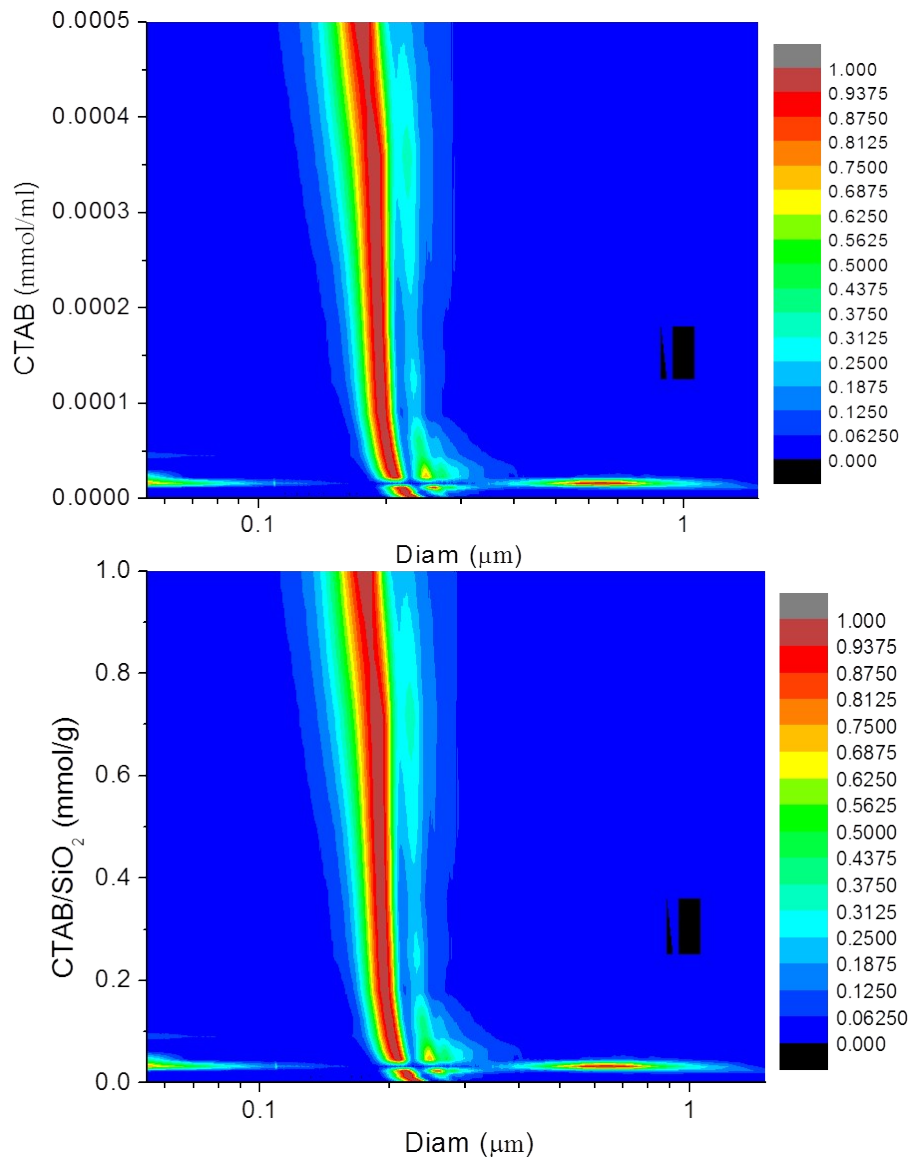

**Figure S3.** 2D size distribution for CTAB-adsorbed SiO<sub>2</sub> particles (210nm) measured by 2D-DCS



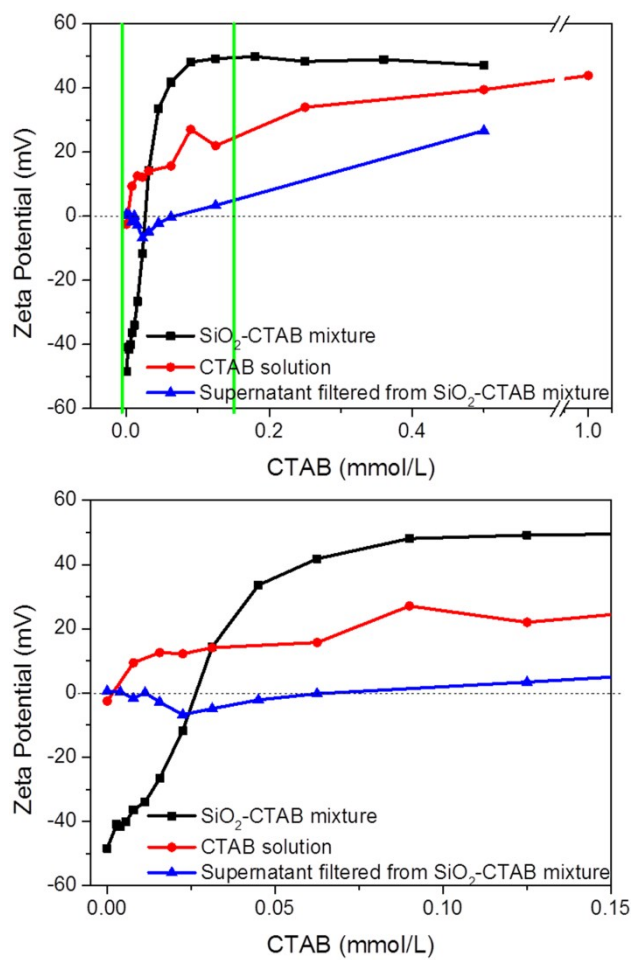

**Figure S4.**  $\zeta$ -potential measurement on the titration of CTAB to SiO<sub>2</sub> NPs (430 nm) in wide range (top panel) and at its initial phase (down panel)

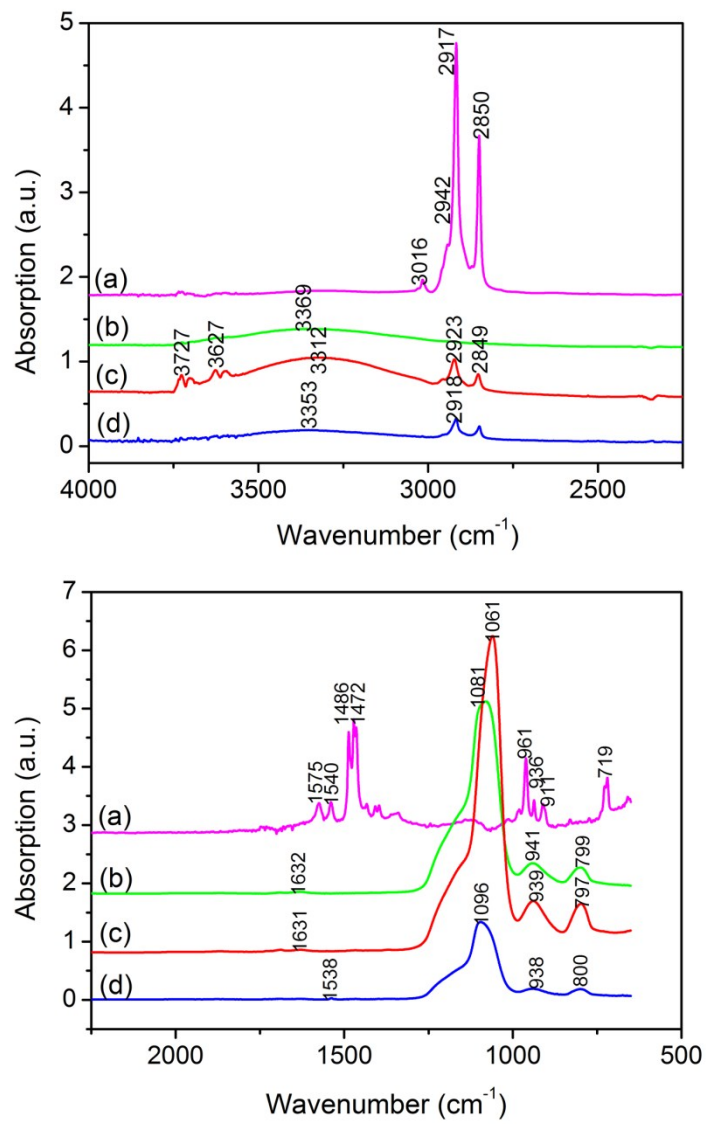

**Figure S5.** FTIR spectra of (a) pure CTAB, (b) pure SiO<sub>2</sub> (1000nm) particles, (c) SiO<sub>2</sub> particles sorbed with CTA<sup>+</sup> molecules, and (d) the same sample as c, but after water washing

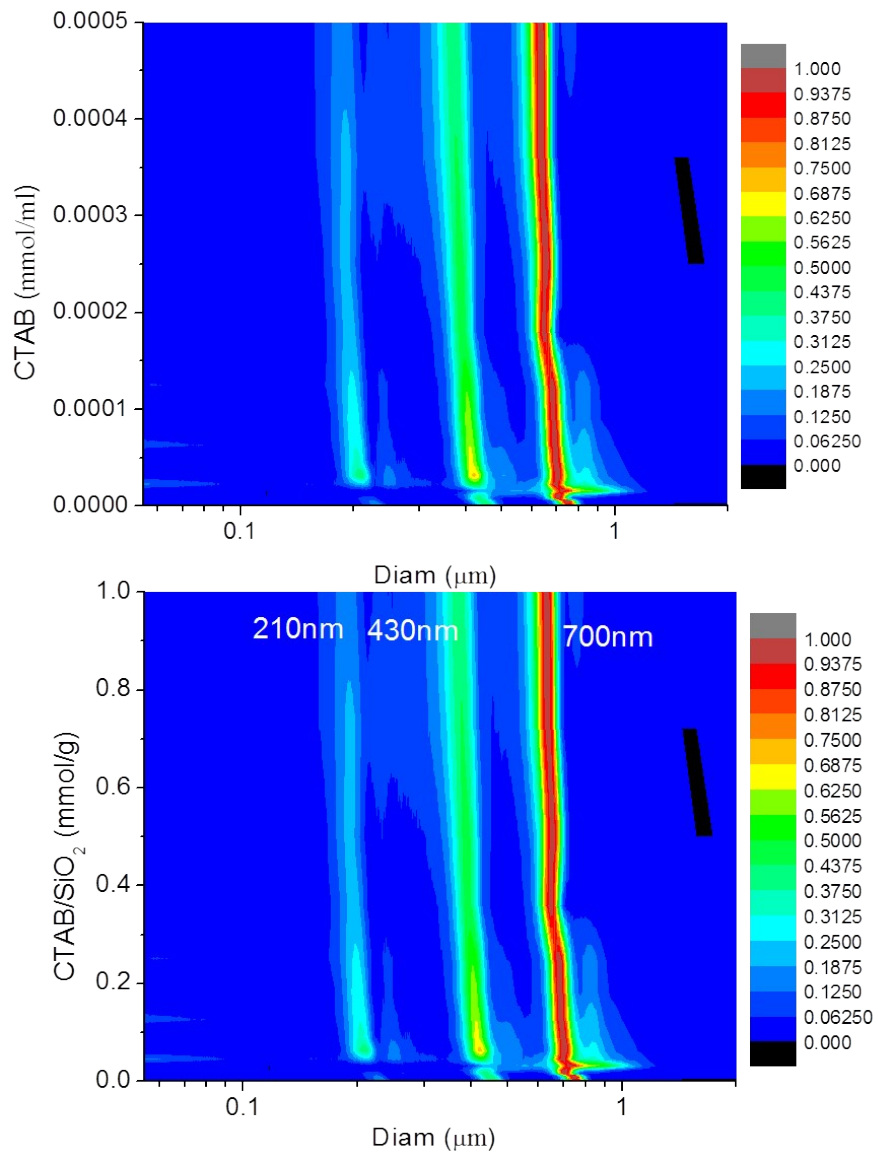

**Figure S6.** 2D size distribution for CTAB-adsorbed SiO<sub>2</sub> particles with multiple size distribution of 210, 430 and 700nm measured by 2D-DCS
